# Supplementary material for: Women’s knowledge and attitudes towards cervical cancer prevention: a cross sectional study in Eastern Uganda
Source: BMC Womens Health. 2017 Jan 31;17:9. doi: 10.1186/s12905-017-0365-3 (PMC5282746; doi:10.1186/s12905-017-0365-3)
Supplement: Additional file 1: — Women’s knowledge and attitudes towards cervical cancer prevention. Description of file: Study questionnaire. (PDF 456 kb) [file 12905_2017_365_MOESM1_ESM.pdf]

# Women's knowledge and attitudes towards cervical cancer prevention: A cross sectional study in Eastern Uganda

## Study questionnaire

Version: 1.2; August 26<sup>th</sup>, 2014

### Section I: Interview parameters

1.1 Questionnaire number: 

|  |  |  |
|--|--|--|
|  |  |  |
|--|--|--|

 1.2 Date of interview: \_\_\_\_/\_\_\_\_/09/2014  
 1.3 Name of Interviewer: \_\_\_\_\_  
 1.4 District: \_\_\_\_\_  
 1.5 Sub County: \_\_\_\_\_ 1.6 Village: \_\_\_\_\_  
 1.7 Start time: \_\_\_\_\_ 1.8 Name of Data Editor: \_\_\_\_\_

**ELIGIBILITY: RESPONDENT SHOULD BE AGED BETWEEN 25 TO 49 YEARS AND SHOULD HAVE SPENT SIX (6) OR MORE MONTHS IN THE DISTRICT**

*Write 99 in case respondent refuses to answer*

### Section II: Sources of information about cervical cancer

| s/n | Question                                                                                     | Response                                                                                                                                                                                               | For editor |
|-----|----------------------------------------------------------------------------------------------|--------------------------------------------------------------------------------------------------------------------------------------------------------------------------------------------------------|------------|
| 2.1 | Have you ever <b>heard</b> about cancer?                                                     | 1. Yes<br>2. No                                                                                                                                                                                        |            |
| 2.2 | Have you ever <b>heard</b> about cervical cancer?<br><b>NO → Next section</b>                | 1. Yes<br>2. No                                                                                                                                                                                        |            |
| 2.3 | Where did you hear about cervical cancer from?<br><br><b>(PROBE and Tick all that apply)</b> | 1. Radio<br>2. Television<br>3. Posters<br>4. Health facility<br>5. Friend/family member<br>6. Newspapers / magazines<br>7. School/learning institution<br>8. Other _____<br>9. Don't know or remember |            |

### **Section III: Knowledge about cervical cancer and screening**

|      |                                                                                                           |                                                                                                                                                                                        |           |
|------|-----------------------------------------------------------------------------------------------------------|----------------------------------------------------------------------------------------------------------------------------------------------------------------------------------------|-----------|
| 3.1  | Do you think that early detection of cervical cancer is helpful?                                          | 1. Yes<br>2. No<br>3. Don't know                                                                                                                                                       |           |
| 3.2  | Do you think that cervical cancer is curable if detected early?                                           | 1. Yes<br>2. No<br>3. Don't know                                                                                                                                                       |           |
| 3.3  | Can someone be vaccinated against cervical cancer?<br><b>NO</b> → <b>3.5</b>                              | 1. Yes<br>2. No<br>3. Don't know                                                                                                                                                       |           |
| 3.4  | What is the recommended age for someone to undergo the vaccination?                                       | 1. _____ years<br>2. Don't know                                                                                                                                                        |           |
| 3.5  | At what age should a woman start screening for cervical cancer?                                           | 1. _____ years<br>2. Don't know                                                                                                                                                        |           |
| 3.6  | How frequently should someone be screened for cervical cancer?                                            | 1. Every _____ Months (write 00 if less than 1 month)<br>2. Don't know                                                                                                                 |           |
| 3.7  | Do you think cervical cancer can be prevented?<br><b>NO</b> → <b>3.9</b>                                  | 1. Yes<br>2. No<br>3. Don't know                                                                                                                                                       |           |
| 3.8  | What cervical cancer preventive measures do you know?<br><b>(PROBE and TICK all that apply)</b>           | 1. Early screening<br>2. Avoiding smoking<br>3. Vaccination<br>4. Nothing can be done<br>5. Others _____<br>6. Don't know                                                              |           |
| 3.9  | What are some of the symptoms of cervical cancer that you know?<br><b>(PROBE and TICK all that apply)</b> | 1. Vaginal bleeding<br>2. Post-coital bleeding<br>3. Weight loss<br>4. Foul smelling vaginal discharge<br>5. Abdominal pain<br>6. Malignancies<br>7. Other _____<br>8. Is asymptomatic |           |
| 3.10 | Which tests can be carried out to detect cervical cancer?<br><b>(PROBE and TICK all that apply)</b>       | 1. Pap smear test<br>2. Cytological screening<br>3. HPV test<br>4. Don't know                                                                                                          |           |
| 3.11 | <b>Total score of knowledge about cervical cancer and screening</b>                                       |                                                                                                                                                                                        | <b>10</b> |

**Section IV: Knowledge about risk factors for cervical cancer**

*Interviewer to read each of the factors to the respondents and then tick the appropriate response provided*

Which of the following are risk factors for cervical cancer?

| s/n  | Factor                                     | Yes | No | Don't know |
|------|--------------------------------------------|-----|----|------------|
| 4.1  | Smoking                                    |     |    |            |
| 4.2  | Many sexual partners                       |     |    |            |
| 4.3  | Human papilloma virus (HPV)                |     |    |            |
| 4.4  | Sexually transmitted diseases              |     |    |            |
| 4.5  | Human immunodeficiency virus (HIV)         |     |    |            |
| 4.6  | Early onset of sexual activity             |     |    |            |
| 4.7  | Family history of cervical cancer          |     |    |            |
| 4.8  | Uncircumcised male partner                 |     |    |            |
| 4.9  | Use of contraceptive pills for a long time |     |    |            |
| 4.10 | Living with a cervical cancer patient      |     |    |            |

|      |                                    |  |    |
|------|------------------------------------|--|----|
| 4.11 | Score of knowledge on risk factors |  | 10 |
|------|------------------------------------|--|----|

|      |                                                                 |  |    |
|------|-----------------------------------------------------------------|--|----|
| 4.12 | Total score of knowledge about cervical cancer and risk factors |  | 20 |
|------|-----------------------------------------------------------------|--|----|

### **Section V: Attitudes towards cervical cancer and screening**

*Interviewer to read each of the factors to the respondents and then record the numbers corresponding with the response given*

To what extent do you agree or disagree with the following statements?

| s/n  | Statement                                                                                     | Strongly disagree<br>[1] | Disagree<br>[2] | Neutral<br>[3] | Agree<br>[4] | Strongly agree<br>[5] |
|------|-----------------------------------------------------------------------------------------------|--------------------------|-----------------|----------------|--------------|-----------------------|
| 5.1  | Cervical cancer is a very severe disease                                                      |                          |                 |                |              |                       |
| 5.2  | I am at risk of getting cervical cancer                                                       |                          |                 |                |              |                       |
| 5.3  | Cervical cancer screening is important                                                        |                          |                 |                |              |                       |
| 5.4  | Only women who are sexually active need cervical cancer screening                             |                          |                 |                |              |                       |
| 5.5  | Women who have had sexually transmitted diseases are more likely to get cervical cancer       |                          |                 |                |              |                       |
| 5.6  | Once cervical cancer has been found, there is not much that can be done about it              |                          |                 |                |              |                       |
| 5.7  | Chances of curing cervical cancer are better when the disease is discovered at an early stage |                          |                 |                |              |                       |
| 5.8  | Cervical cancer is a death sentence for most people                                           |                          |                 |                |              |                       |
| 5.9  | There is little a woman can do to reduce her chances of getting cervical cancer               |                          |                 |                |              |                       |
| 5.10 | Women who have cervical cancer will have some kind of symptoms showing it                     |                          |                 |                |              |                       |
| 5.11 | Cervical cancer runs in families                                                              |                          |                 |                |              |                       |
| 5.12 | Women only need cervical cancer screening tests during child bearing years.                   |                          |                 |                |              |                       |
| 5.13 | I would vaccinate myself against cervical cancer                                              |                          |                 |                |              |                       |
| 5.14 | I Would allow my children to be vaccinated against cervical cancer                            |                          |                 |                |              |                       |
| 5.15 | My family would approve of children being vaccinated against cervical cancer                  |                          |                 |                |              |                       |

### Section VI: Respondent characteristics

| s/n  | Question                                                   | Coding categories                                                                                                      | For editor |
|------|------------------------------------------------------------|------------------------------------------------------------------------------------------------------------------------|------------|
| 6.1  | How old are you?<br><b>(Record age in completed years)</b> | _____                                                                                                                  |            |
| 6.2  | What is your religion                                      | 1. Catholic<br>2. Protestant<br>3. Muslim<br>4. Pentecostal<br>5. SDA<br>6. Other _____                                |            |
| 6.3  | What is the highest level of education you attained?       | 1. None<br>2. Primary (P1 to P7)<br>3. O level (S1 to S4)<br>4. A level (S5 to S6)<br>5. Tertiary education/University |            |
| 6.4  | What is your tribe?                                        | 1. Musoga<br>2. Muganda<br>3. Other _____                                                                              |            |
| 6.5  | What is your marital status?<br><br><b>1, 3 or 4 → 6.7</b> | 1. Single<br>2. Married<br>3. Widowed<br>4. Divorced/Separated                                                         |            |
| 6.6  | Are you in a monogamous or polygamous relationship?        | 1. Monogamous<br>2. Polygamous                                                                                         |            |
| 6.7  | What is your occupation?                                   | 1. Agriculture / Farming<br>2. Business / Trade<br>3. Housewife<br>4. Civil servant<br>5. Other _____                  |            |
| 6.8  | Are you the head of your household?<br><b>YES → 6.10</b>   | 1. Yes<br>2. No                                                                                                        |            |
| 6.9  | What is your relationship with the head of the household?  | 1. Wife<br>2. Parent<br>3. Sister<br>4. Daughter<br>5. Other Relative<br>6. Not related                                |            |
| 6.10 | How many deliveries have you had?                          | _____                                                                                                                  |            |
| 6.11 | How many people stay in this household on a regular basis? | _____                                                                                                                  |            |
| 6.12 | What is your average household monthly income?             | _____ Uganda Shillings                                                                                                 |            |
| 6.13 | How long have you lived in this district?                  | 1. Less than 1 year<br>2. Between 1 to 5 years<br>3. More than 5 years                                                 |            |

|      |                                                                                       |                                                                                                                                                                                           |  |
|------|---------------------------------------------------------------------------------------|-------------------------------------------------------------------------------------------------------------------------------------------------------------------------------------------|--|
|      |                                                                                       | 4. All my life<br>5. Don't know / remember                                                                                                                                                |  |
| 6.14 | Where do you reside?<br><b>(Interviewer to ask and determine)</b>                     | 1. Rural area<br>2. Semi-urban area<br>3. Urban area                                                                                                                                      |  |
| 6.15 | Have you ever used any method to delay or avoid getting pregnant?<br><b>NO → 6.17</b> | 1. Yes<br>2. No                                                                                                                                                                           |  |
| 6.16 | Which methods have you used?<br><b>(Tick all that apply)</b>                          | 1. Female sterilization<br>2. Pill<br>3. IUDs<br>4. Injectables<br>5. Implants<br>6. Condom<br>7. Diaphragm<br>8. Foam/jelly<br>9. Lam<br>10. Rhythm/calendar<br>11. Other (specify)_____ |  |
| 6.20 | Have you ever tested for HIV?<br><b>NO → End.</b>                                     | 1. Yes<br>2. No                                                                                                                                                                           |  |

\*\*\*Thank you for your time\*\*\*

End time: \_\_\_\_\_

#### Interview result codes

1. Completed
2. Partly completed- give reason \_\_\_\_\_
3. Other (specify) \_\_\_\_\_
